# Supplementary material
Source: Springer Nature journal article supplement (https://www.springermedizin.de/resource/supplementary/12891_2013_1970_MOESM1_ESM.pdf/9508924)

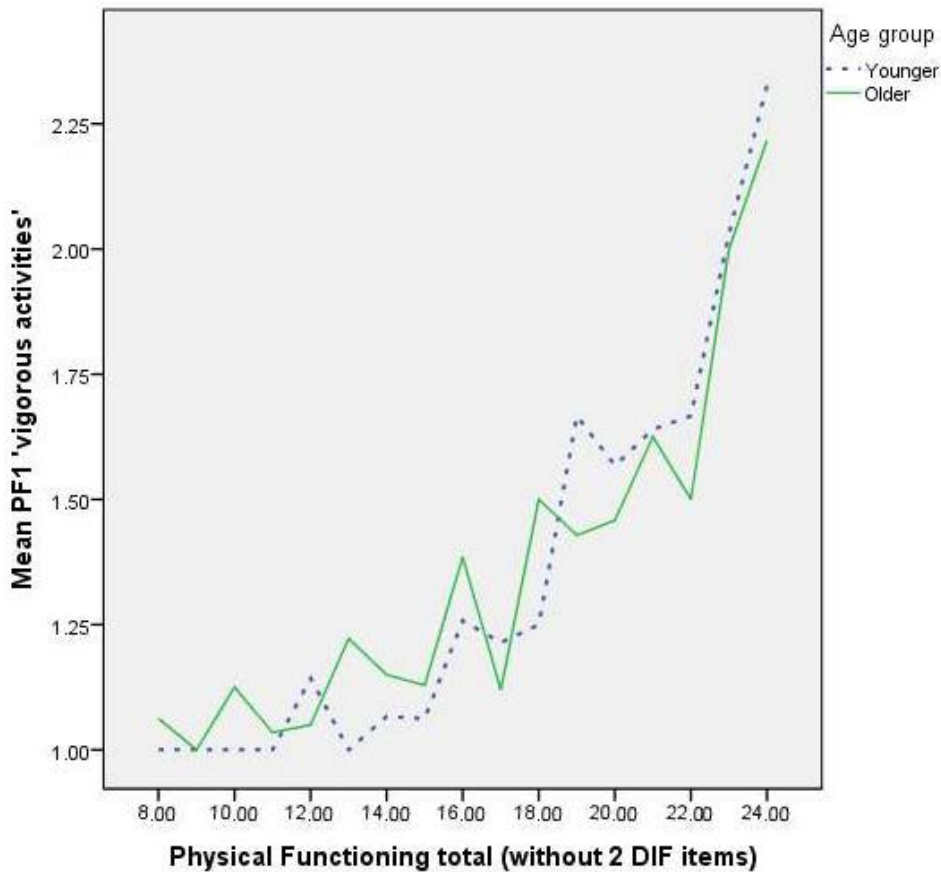

Supplement: MOESM1 [file 9508924]
